# Supplementary material
Source: PubMed Central journal article supplement (PMC7395578)
Supplement: 415_2020_9978_MOESM1_ESM.pdf [file 415_2020_9978_MOESM1_ESM.pdf]

| Study                                | Age | Sex    | Comorbidities                  | Symptoms                                   | Neurological symptoms (at any stage of the infection) | CSF (SARS-CoV-2) | Brain imaging                          | EEG                      | D-Dimer ( $\mu\text{g/L}$ ) |
|--------------------------------------|-----|--------|--------------------------------|--------------------------------------------|-------------------------------------------------------|------------------|----------------------------------------|--------------------------|-----------------------------|
| (Al Saiegh et al. 2020)              | 62  | Female | NA                             | Na                                         | Hemiparesis, aphasia                                  | Negative         | Left IPH                               |                          |                             |
| (Al-Olama, Rashid, and Garozzo 2020) | 36  | Male   |                                | Fever, headache, cough, digestive symptoms | Fatigue, impaired consciousness                       | Positive         | Right frontal iph, meningoencephalitis |                          | 790                         |
| (Avula et al. 2020)                  | 73  | Male   | Carotid stenosis, hypertension | Fever, dyspnea, digestive symptoms         | Impaired consciousness                                |                  | Left parieto-occipital stroke          |                          | Not evaluated               |
|                                      | 83  | Female | Diabetes, hypertension         | Fever                                      | Speech impairment, left facial paresis                |                  |                                        |                          | Not evaluated               |
|                                      | 80  | Female | Hypertension                   |                                            | Impaired consciousness, hemiparesis, aphasia          |                  | Right MCA stroke                       |                          | >1000                       |
| (Bernard-Valnet et al. 2020)         | 64  | Female |                                | Cough                                      | Myalgia, seizure, psychotic symptoms                  | Negative         | Negative                               | Focal status epilepticus |                             |
|                                      | 67  | Female |                                | Mild respiratory                           | Impaired consciousness, hemianopsia, hemineglet       | Negative         |                                        |                          |                             |
| (Beyrouti et al. 2020)               | 64  | Male   | Nil                            | Cough, dyspnea, fever                      | Myalgia, speech impairment, hemianopsia, ataxia       |                  | Left pica stroke, bilateral pca stroke |                          | > 80000                     |

|                               |    |        |                                           |                                      |                                                      |          |                                                    |  |       |
|-------------------------------|----|--------|-------------------------------------------|--------------------------------------|------------------------------------------------------|----------|----------------------------------------------------|--|-------|
|                               | 53 | Female | Cardiovascular disease                    | Cough, dyspnea                       | Impaired consciousness                               |          | Left cerebellar and right parieto-occipital stroke |  | 7750  |
|                               | 85 | Male   |                                           | Cardiovascular disease, hypertension | Dysarthria, hemiparesis                              |          | Left pca stroke                                    |  | 16100 |
|                               | 61 | Male   | Hypertension, previous stroke             |                                      | Dysarthria, hemiparesis                              |          | Right striatal stroke                              |  | 27190 |
|                               | 83 | Male   | Cardiovascular disease, diabetes, smoking |                                      | Dysarthria, hemiparesis                              |          | Right M2 stroke                                    |  | 19450 |
|                               | 73 | Male   |                                           |                                      | Speech impairment, hemiparesis                       |          | Bilateral PCA stroke                               |  | 1080  |
| (Camdessanche et al. 2020)    | 64 | Male   | Nil                                       | Fever, cough                         | Guillan-Barré                                        | Negative |                                                    |  |       |
| (Dinkin et al. 2020)          | 36 | Male   |                                           | Fever, cough                         | Myalgia, Miller-Fisher syndrome                      |          | III CN altered signal                              |  |       |
|                               | 71 | Female |                                           | Fever, cough                         | Diplopia                                             | Negative | Optic nerve altered signal                         |  |       |
| (Dixon et al. 2020)           | 59 | Female | Aplastic anemia                           | Fever, cough                         | Headache, seizures, impaired consciousness           | Negative | Multiple hemorrhages                               |  | 2033  |
| (Gutiérrez-Ortiz et al. 2020) | 50 | Male   | Nil                                       | Cough, fever                         | Miller-Fisher syndrome, headache, anosmia, dysegesia | Negative |                                                    |  |       |
|                               | 39 | Male   | Nil                                       | Digestive symptoms, fever            | Polyneuritis cranialis, dysegesia                    | Negative |                                                    |  |       |
| (Heman-Ackah et al. 2020)     | 58 | Female | Diabetes, lupus                           | Fever, cough, dyspnea                | Progressive cognitive deterioration, coma            |          | Left frontal IPH                                   |  |       |

|                             |    |        |                                                                  |                       |                                               |          |                                |                                    |        |
|-----------------------------|----|--------|------------------------------------------------------------------|-----------------------|-----------------------------------------------|----------|--------------------------------|------------------------------------|--------|
|                             | 46 | Male   | Hypertension, OSA                                                | Fever, cough, dyspnea | Coma at day 13                                |          | Left frontal IPH               |                                    |        |
| (Hepburn et al. 2020)       | 82 | Male   | Cardiovascular disease, CKD, COPD, venous thromboembolic disease | Dyspnea               | Impaired consciousness, right partial seizure |          |                                | Bilateral fronto-temporal seizures | 590    |
| (Moriguchi et al. 2020)     | 24 | Male   | Nil                                                              | Fever, pharyngodynia  | Headache, fatigue, seizure                    | Positive | Ventriculitis and encephalitis |                                    |        |
| (Ottaviani et al. 2020)     | 66 | Female |                                                                  | Fever, cough          | Guillain-Barré syndrome                       | Negative |                                |                                    |        |
| (Padroni et al. 2020)       | 70 | Female |                                                                  | Fever, cough          | Guillan-Barré syndrome                        | Negative |                                |                                    | Normal |
| (Pilotto et al. 2020)       | 60 | Male   | Nil                                                              | Fever, cough          | Impaired consciousness                        | Negative | Negative                       | No epileptic activity              | 968    |
| (Rábano-Suárez et al. 2020) | 63 | Male   |                                                                  | Fever, dyspnea        | Anosmia, myoclonus                            | Negative |                                | No epileptic activity              | 4784   |
|                             | 88 | Female | hypertension, hypothyroidism, hypopituitarism                    |                       | Myoclonus                                     |          |                                | No epileptic activity              | 867    |
|                             | 76 | Male   |                                                                  | Fever                 | Anosmia, dysgeusia, myalgia, myoclonus        |          |                                | No epileptic activity              | 18239  |
| (Sedaghat and Karimi 2020)  | 65 | Male   |                                                                  | Cough, fever, dyspnea | Guillan-Barré, facial paresis                 |          | Negative                       |                                    |        |
| (Scheidl et al. 2020)       | 54 | Female | Nil                                                              |                       | Modified Guillain-Barré, anosmia              |          | NA                             |                                    |        |

|                       |    |        |                                                                      |              |                                                                                  |          |  |                                  |  |
|-----------------------|----|--------|----------------------------------------------------------------------|--------------|----------------------------------------------------------------------------------|----------|--|----------------------------------|--|
| (Sohal et al. 2020)   | 72 | Male   | Cardiovascular disease, diabetes, hemodialysis for CKD, hypertension |              | Seizure                                                                          |          |  | Left temporal focus              |  |
| (Somani et al. 2020)  | 49 | Female | Psychiatric disorder, rheumatoid arthritis                           |              | Status epilepticus                                                               |          |  | Midline and left frontal seizure |  |
|                       | 73 | Female | CKD, diabetes mellitus, encephalocele, obesity                       | Dyspnea      | Status epilepticus                                                               |          |  | Bilateral frontal seizure        |  |
| (Toscano et al. 2020) | 77 | Female |                                                                      | Fever, cough | Guillain-barré syndrome (sensory -motor axonal subtype)                          | Negative |  |                                  |  |
|                       | 23 | Male   |                                                                      |              | Facial palsy, dysgeusia, Guillain-Barré syndrome (sensory -motor axonal subtype) | Negative |  |                                  |  |
|                       | 55 | Male   |                                                                      | Fever, cough | Guillain-barré syndrome (acute motor axonal)                                     | Negative |  |                                  |  |
|                       | 76 | Male   |                                                                      |              | Guillain-Barré syndrome (demyelinating)                                          | Negative |  |                                  |  |

|                     |    |        |         |                |                                                                  |          |                             |                         |  |
|---------------------|----|--------|---------|----------------|------------------------------------------------------------------|----------|-----------------------------|-------------------------|--|
|                     | 61 | Male   |         | Cough          | Guillain-barré syndrome (demyelinating), anosmia, dysgeusia      | Negative |                             |                         |  |
| (Zanin et al. 2020) | 54 | Female |         |                | Anosmia, dysgeusia, dizziness                                    | Negative | Diffuse demyelination signs | Fronto-temporal seizure |  |
| (Zayet et al. 2020) | 68 | Male   | Obesity |                | Impaired consciousness                                           | Negative | Negative                    |                         |  |
|                     | 39 | M      |         | cough, dyspnea | anosmia, dysgeusia, headache, dysarthria, impaired consciousness |          | negative                    |                         |  |

CKD chronic kidney disease, CN cranial nerve, COPD chronic obstructive pulmonary disease, IPH intraparenchymal hemorrhage, OSA Obstructive sleep apnea

Al-Olama, Mohammad, Anas Rashid, and Debora Garozzo. 2020. "COVID-19-Associated Meningoencephalitis Complicated with Intracranial Hemorrhage: A Case Report." *Acta Neurochirurgica*, May, 1–5. <https://doi.org/10.1007/s00701-020-04402-w>

Avula, Akshay, Krishna Nalleballe, Naureen Narula, Steven Sapozhnikov, Vasuki Dandu, Sudhamshi Toom, Allison Glaser, and Dany Elsayegh. 2020. "COVID-19 Presenting as Stroke." *Brain, Behavior, and Immunity*, April. <https://doi.org/10.1016/j.bbi.2020.04.077>.

Bernard-Valnet, Raphaël, Beatrice Pizzarotti, Angelica Anichini, Yoris Demars, Enrico Russo, Marie Schmidhauser, Jonathan Cerutti-Sola, et al. 2020. "Two Patients with Acute Meningo-Encephalitis Concomitant to SARS-CoV-2 Infection." *European Journal of Neurology*, May. <https://doi.org/10.1111/ene.14298>

Beyrouti, Rahma, Matthew E Adams, Laura Benjamin, Hannah Cohen, Simon F Farmer, Yee Yen Goh, Fiona Humphries, et al. 2020. "Characteristics of Ischaemic Stroke Associated with COVID-19." *Journal of Neurology, Neurosurgery, and Psychiatry*. <https://doi.org/10.1136/jnnp-2020-323586>.

Camdessanche, J. P., J. Morel, B. Pozzetto, S. Paul, Y. Tholance, and E. Botelho-Nevers. 2020. "COVID-19 May Induce Guillain–Barré Syndrome." *Revue Neurologique*. <https://doi.org/10.1016/j.neurol.2020.04.003>.

- Dinkin, Marc, Virginia Gao, Joshua Kahan, Sarah Bobker, Marialaura Simonetto, Paul Wechsler, Jasmin Harpe, et al. 2020. "COVID-19 Presenting with Ophthalmoparesis from Cranial Nerve Palsy." *Neurology*, May. <https://doi.org/10.1212/WNL.0000000000009700>.
- Dixon, Luke, James Varley, Anastassia Gontsarova, Dermot Mallon, Francesca Tona, David Muir, Asad Luqmani, et al. 2020. "COVID-19-Related Acute Necrotizing Encephalopathy with Brain Stem Involvement in a Patient with Aplastic Anemia." *Neurology(R) Neuroimmunology & Neuroinflammation* 7 (5). <https://doi.org/10.1212/NXI.0000000000000789>.
- Gutiérrez-Ortiz, Consuelo, Antonio Méndez, Sara Rodrigo-Rey, Eduardo San Pedro-Murillo, Laura Bermejo-Guerrero, Ricardo Gordo-Mañas, Fernando de Aragón-Gómez, and Julián Benito-León. 2020. "Miller Fisher Syndrome and Polyneuritis Cranialis in COVID-19." *Neurology*, April. <https://doi.org/10.1212/WNL.0000000000009619>.
- Heman-Ackah, Sabrina M, YouRong Sophie Su, Michael Spadola, Dmitriy Petrov, H Isaac Chen, James Schuster, Timothy Lucas, et al. 2020. "Neurologically Devastating Intraparenchymal Hemorrhage in COVID-19 Patients on Extracorporeal Membrane Oxygenation: A Case Series." *Neurosurgery*, May. <https://doi.org/10.1093/neuros/nyaa198>
- Hepburn, Madihah, Naresh Mullaguri, Pravin George, Stephen Hantus, Vineet Punia, Adarsh Bhimraj, and Christopher R Newey. 2020. "Acute Symptomatic Seizures in Critically Ill Patients with COVID-19: Is There an Association?" *Neurocritical Care*, May. <https://doi.org/10.1007/s12028-020-01006-1>.
- Moriguchi, Takeshi, Norikazu Harii, Junko Goto, Daiki Harada, Hisanori Sugawara, Junichi Takamino, Masateru Ueno, et al. 2020. "A First Case of Meningitis/Encephalitis Associated with SARS-Coronavirus-2." *International Journal of Infectious Diseases* 94: 55–58. <https://doi.org/https://doi.org/10.1016/j.ijid.2020.03.062>.
- Ottaviani, Donatella, Federica Boso, Enzo Tranquillini, Ilaria Gapeni, Giovanni Pedrotti, Susanna Cozzio, Giovanni M Guarrera, et al. 2020. "Early Guillain-Barré Syndrome in Coronavirus Disease 2019 (COVID-19): A Case Report from an Italian COVID-Hospital." *Neurological Sciences*, May, 1–4. <https://doi.org/10.1007/s10072-020-04449-8>
- Padroni, Marina, Vincenzo Mastrangelo, Gian Maria Asioli, Lucia Pavolucci, Samir Abu-Rumeileh, Maria Grazia Piscaglia, Pietro Querzani, Claudio Callegarini, and Matteo Foschi. 2020. "Guillain-Barré Syndrome Following COVID-19: New Infection, Old Complication?" *Journal of Neurology*. <https://doi.org/10.1007/s00415-020-09849-6>.
- Pilotto, Andrea, Silvia Odolini, S Stefano Masciocchi, Agnese Comelli, Irene Volonghi, Stefano Gazzina, Sara Nocivelli, et al. 2020. "Steroid-Responsive Encephalitis in Covid-19 Disease." *Annals of Neurology*, May. <https://doi.org/10.1002/ana.25783>
- Rábano-Suárez, Pablo, Laura Bermejo-Guerrero, Antonio Méndez-Guerrero, Javier Parra-Serrano, Daniel Toledo-Alfocea, Daniel Sánchez-Tejerina, Teresa Santos-Fernández, et al. 2020. "Generalized Myoclonus in COVID-19." *Neurology*, May. <https://doi.org/10.1212/WNL.0000000000009829>
- Saiegh, Fadi Al, Ritam Ghosh, Adam Leibold, Michael B Avery, Richard F Schmidt, Thana Theofanis, Nikolaos Mouchtouris, et al. 2020. "Status of SARS-CoV-2 in Cerebrospinal Fluid of Patients with COVID-19 and Stroke." *Journal of Neurology, Neurosurgery and Psychiatry*, April. <https://doi.org/10.1136/jnnp-2020-323522>
- Scheidl, Erika, Daniel Diez Canseco, Aleksandar Hadji-Naumov, and Benjamin Berezna. 2020. "Guillain-Barré Syndrome during SARS-CoV-2 Pandemic: A Case Report and Review of Recent Literature." *Journal of the Peripheral Nervous System : JPNS*. United States. <https://doi.org/10.1111/jns.12382>.
- Sedaghat, Zahra, and Narges Karimi. 2020. "Guillain Barre Syndrome Associated with COVID-19 Infection: A Case Report." *Journal of Clinical Neuroscience*. <https://doi.org/10.1016/j.jocn.2020.04.062>.

Sohal, Sandeep, Mansur Mossammat, Sohal S., and Mansur M. 2020. "COVID-19 Presenting with Seizures." *IDCases* 20 (May): e00782. <https://doi.org/10.1016/j.idcr.2020.e00782>

Somani, Sana, Sandipan Pati, Tyler Gaston, Alissa Chitlangia, Shruti Agnihotri, Somani S., Pati S., Gaston T., Chitlangia A., and Agnihotri S. 2020. "De Novo Status Epilepticus in Patients with COVID-19." *Annals of Clinical and Translational Neurology*, May. <https://doi.org/10.1002/acn3.51071>

Toscano, Gianpaolo, Francesco Palmerini, Sabrina Ravaglia, Luigi Ruiz, Paolo Invernizzi, M. Giovanna Cuzzoni, Diego Franciotta, et al. 2020. "Guillain–Barré Syndrome Associated with SARS-CoV-2." *New England Journal of Medicine*. <https://doi.org/10.1056/nejmc2009191>.

Zanin, Luca, Giorgio Saraceno, Pier Paolo Panciani, Giulia Renisi, Liana Signorini, Karol Migliorati, and Marco Maria Fontanella. 2020. "SARS-CoV-2 Can Induce Brain and Spine Demyelinating Lesions." *Acta Neurochirurgica*, May, 1–4. <https://doi.org/10.1007/s00701-020-04374-x>

Zayet, Souheil, Yousri Ben Abdallah, Pierre-Yves Royer, Lynda Toko-Tchiundzie, Vincent Gendrin, and Timothee Klopfenstein. 2020. "Encephalopathy in Patients with COVID-19: 'Causality or Coincidence?'" *Journal of Medical Virology*, May. <https://doi.org/10.1002/jmv.26027>
